# Supplementary material for: Development of a risk prediction tool for patients with locally advanced and recurrent rectal cancer undergoing pelvic exenteration: protocol for a mixed-methods study
Source: PubMed Central journal article supplement — BMJ Open. 2023 Aug 30;13(8):e075304. doi: 10.1136/bmjopen-2023-075304 (PMC10471871; doi:10.1136/bmjopen-2023-075304), 2023-08-30
Supplement: bmjopen-2023-075304supp001.pdf [file bmjopen-2023-075304supp001.pdf]

## MEDLINE SEARCH STRATEGY

1. Pelvic Exenteration/
2. (pelvi\* and exent\*).mp.
3. pelvic clearance.mp.
4. extended resection\*.mp.
5. extended radical resection\*.mp.
6. (salvage adj2 (surger\* or resect\* or excis\*)).mp.
7. ((multi?visceral or multi?organ) adj2 (surger\* or resect\* or excis\*)).mp.
8. 1 or 2 or 3 or 4 or 5 or 6 or 7
9. Rectal Neoplasms/
10. ((rectal or rectum) adj2 (neoplas\* or cancer\* or tumour\* or tumor\* or malignan\* or carcinom\* or adenocarcinoma\* or recurren\* or regrowth or mass)).mp.
11. 9 or 10
12. 8 and 11
13. limit 12 to (english language and yr="1990 -Current")

## EMBASE SEARCH STRATEGY

1. pelvis exenteration/
2. (pelvi\* and exent\*).mp.
3. pelvic clearance.mp.
4. extended resection\*.mp.
5. extended radical resection\*.mp.
6. (salvage adj2 (surger\* or resect\* or excis\*)).mp.
7. ((multi?visceral or multi?organ) adj2 (surger\* or resect\* or excis\*)).mp.
8. 1 or 2 or 3 or 4 or 5 or 6 or 7 or 8
9. rectum tumor/
10. exp rectum cancer/
11. rectum carcinoma/
12. ((rectal or rectum) adj2 (neoplas\* or cancer\* or tumour\* or tumor\* or malignan\* or carcinom\* or adenocarcinoma\* or recurren\* or regrowth or mass)).mp.
13. 9 or 10 or 11 or 12
14. 8 and 13
15. limit 14 to (english language and yr="1990 -Current")

**COCHRANE CENTRAL REGISTER OF CONTROLLED TRIALS SEARCH STRATEGY**

1. Pelvic Exenteration/
2. (pelvi\* and exent\*).mp.
3. pelvic clearance.mp.
4. extended resection\*.mp.
5. extended radical resection\*.mp.
6. (salvage adj2 (surger\* or resect\* or excis\*)).mp.
7. ((multi?visceral or multi?organ) adj2 (surger\* or resect\* or excis\*)).mp.
8. 1 or 2 or 3 or 4 or 5 or 6 or 7
9. Rectal Neoplasms/
10. ((rectal or rectum) adj2 (neoplas\* or cancer\* or tumour\* or tumor\* or malignan\* or carcinom\* or adenocarcinoma\* or recurren\* or regrowth or mass)).mp.
11. 9 or 10
12. 8 and 11
13. limit 12 to (english language and yr="1990 -Current")

## CINAHL SEARCH STRATEGY

S1. (MH "Pelvic Exenteration")

S2. "pelvic exenteration\*"

S3. (pelvi\* and exent\*)

S4. "pelvic clearance"

S5. "extended resection\*"

S6. "extended radical resection\*"

S7. (Salvage N2 (surger\* or resect\* or excis\*))

S8. ((multi\$visceral or multi\$organ) N2 (surger\* or resect\* or excis\*))

S9. S1 OR S2 OR S3 OR S4 OR S5 OR S6 OR S7 OR S8

S10. (MH "Rectal Neoplasms+")

S11. ((rectal or rectum) N2 (neoplas\* or cancer\* or tumour\* or tumor\* or malignan\* or carcinom\* or adenocarcinoma\* or recurren\* or regrowth or mass))

S12. S10 OR S11

S13. S9 AND S12

S14. S9 AND S12 **Limiters** - Published Date: 19900101-20221231

S15. S9 AND S12 **Narrow by Language:** - english

**SCOPUS SEARCH STRATEGY**

( TITLE-ABS-KEY ( ( pelvi\* AND exent\* ) OR "pelvic clearance" OR "extended\* resection\*" ) OR TITLE-ABS-KEY ( salvage W/2 ( surger\* OR resect\* OR excis\* ) ) OR TITLE-ABS-KEY ( ( ( multi?visceral OR multi?organ ) W/2 ( surger\* OR resect\* OR excis\* ) ) ) )

AND

TITLE-ABS-KEY ( ( ( rectal OR rectum ) W/2 ( neoplas\* OR cancer\* OR tumour\* OR tumor\* OR malignan\* OR carcinom\* OR adenocarcinoma\* OR recurren\* OR regrowth OR mass ) ) ) )

AND

( LIMIT-TO ( PUBYEAR , 1990 - 2022 ) )

AND

( LIMIT-TO ( LANGUAGE , "English" ) )
